# Supplementary material
Source: MDPI journal article supplement (https://www.mdpi.com/2073-4441/15/4/774)
Supplement: s1 [file s1]

## Supporting information

# Next-Generation DNA Barcoding for Fish Identification Using High-Throughput Sequencing in Tai Lake, China

Yawen Mu <sup>1,3</sup>, Chao Song <sup>2</sup>, Jianghua Yang <sup>1,\*</sup>, Yong Zhang <sup>3</sup> and Xiaowei Zhang <sup>1</sup>

<sup>1</sup> State Key Laboratory of Pollution Control & Resource, School of the Environment, Nanjing University, Nanjing University Xianlin Campus, 163 Xianlin Avenue, Nanjing 210023, China

<sup>2</sup> Freshwater Fisheries Research Center, Chinese Academy of Fishery Science, Wuxi 214081, China

<sup>3</sup> Jiangsu Provincial Environmental Monitoring Center, Nanjing 210019, China

\* Correspondence: yangjianghua1012@163.com

**Table S1 List of specimens collected from Tai Lake**

| Sample ID | Species                           | Order         | Family     | Genus          | Country | Lake     | Sampling Site | Collection Date | Lon     | Lat    |
|-----------|-----------------------------------|---------------|------------|----------------|---------|----------|---------------|-----------------|---------|--------|
| 1         | <i>Acheilognathus chankaensis</i> | Cypriniformes | Cyprinidae | Acheilognathus | China   | Tai Lake | PingTaiShan   | 2014/6/10       | 120.034 | 31.214 |
| 2         | <i>Acheilognathus chankaensis</i> | Cypriniformes | Cyprinidae | Acheilognathus | China   | Tai Lake | TangLou       | 2014/6/18       | 120.180 | 31.027 |
| 3         | <i>Acheilognathus chankaensis</i> | Cypriniformes | Cyprinidae | Acheilognathus | China   | Tai Lake | PingTaiShan   | 2014/6/10       | 120.034 | 31.214 |
| 4         | <i>Acheilognathus chankaensis</i> | Cypriniformes | Cyprinidae | Acheilognathus | China   | Tai Lake | TangLou       | 2014/6/18       | 120.180 | 31.027 |
| 5         | <i>Acheilognathus chankaensis</i> | Cypriniformes | Cyprinidae | Acheilognathus | China   | Tai Lake | PingTaiShan   | 2014/6/10       | 120.034 | 31.214 |
| 6         | <i>Acheilognathus chankaensis</i> | Cypriniformes | Cyprinidae | Acheilognathus | China   | Tai Lake | PingTaiShan   | 2014/6/10       | 120.034 | 31.214 |
| 7         | <i>Acheilognathus chankaensis</i> | Cypriniformes | Cyprinidae | Acheilognathus | China   | Tai Lake | TangLou       | 2014/6/18       | 120.180 | 31.027 |
| 8         | <i>Acheilognathus chankaensis</i> | Cypriniformes | Cyprinidae | Acheilognathus | China   | Tai Lake | PingTaiShan   | 2014/6/10       | 120.034 | 31.214 |
| 9         | <i>Acheilognathus chankaensis</i> | Cypriniformes | Cyprinidae | Acheilognathus | China   | Tai Lake | PingTaiShan   | 2014/6/10       | 120.034 | 31.214 |
| 10        | <i>Acheilognathus</i>             | Cypriniformes | Cyprinidae | Acheilognathus | China   | Tai Lake | PingTaiShan   | 2014/6/10       | 120.034 | 31.214 |

|    |                                   |               |            |                |       |          |             |           |         |        |
|----|-----------------------------------|---------------|------------|----------------|-------|----------|-------------|-----------|---------|--------|
|    | <i>chankaensis</i>                |               |            |                |       |          |             |           |         |        |
| 11 | <i>Acheilognathus chankaensis</i> | Cypriniformes | Cyprinidae | Acheilognathus | China | Tai Lake | KeShiZhan   | 2014/6/22 | 120.316 | 31.251 |
| 12 | <i>Acheilognathus chankaensis</i> | Cypriniformes | Cyprinidae | Acheilognathus | China | Tai Lake | TangLou     | 2014/6/18 | 120.180 | 31.027 |
| 13 | <i>Acheilognathus chankaensis</i> | Cypriniformes | Cyprinidae | Acheilognathus | China | Tai Lake | TangLou     | 2014/6/18 | 120.180 | 31.027 |
| 14 | <i>Acheilognathus gracilis</i>    | Cypriniformes | Cyprinidae | Acheilognathus | China | Tai Lake | PingTaiShan | 2014/6/10 | 120.034 | 31.214 |
| 15 | <i>Acheilognathus gracilis</i>    | Cypriniformes | Cyprinidae | Acheilognathus | China | Tai Lake | KeShiZhan   | 2014/6/22 | 120.316 | 31.251 |
| 16 | <i>Acheilognathus gracilis</i>    | Cypriniformes | Cyprinidae | Acheilognathus | China | Tai Lake | KeShiZhan   | 2014/6/22 | 120.316 | 31.251 |
| 17 | <i>Rhodeus sinensis</i>           | Cypriniformes | Cyprinidae | Rhodeus        | China | Tai Lake | GongHu      | 2014/6/22 | 120.286 | 31.337 |
| 18 | <i>Acheilognathus imberbis</i>    | Cypriniformes | Cyprinidae | Acheilognathus | China | Tai Lake | TangLou     | 2014/6/18 | 120.180 | 31.027 |
| 19 | <i>Acheilognathus imberbis</i>    | Cypriniformes | Cyprinidae | Acheilognathus | China | Tai Lake | KeShiZhan   | 2014/6/22 | 120.316 | 31.251 |
| 20 | <i>Acheilognathus imberbis</i>    | Cypriniformes | Cyprinidae | Acheilognathus | China | Tai Lake | TangLou     | 2014/6/18 | 120.180 | 31.027 |
| 21 | <i>Acheilognathus imberbis</i>    | Cypriniformes | Cyprinidae | Acheilognathus | China | Tai Lake | TangLou     | 2014/6/18 | 120.180 | 31.027 |
| 22 | <i>Acheilognathus imberbis</i>    | Cypriniformes | Cyprinidae | Acheilognathus | China | Tai Lake | TangLou     | 2014/6/18 | 120.180 | 31.027 |
| 23 | <i>Acheilognathus imberbis</i>    | Cypriniformes | Cyprinidae | Acheilognathus | China | Tai Lake | TangLou     | 2014/6/18 | 120.180 | 31.027 |
| 24 | <i>Rhodeus sinensis</i>           | Cypriniformes | Cyprinidae | Rhodeus        | China | Tai Lake | TangLou     | 2014/6/18 | 120.180 | 31.027 |
| 25 | <i>Acheilognathus imberbis</i>    | Cypriniformes | Cyprinidae | Acheilognathus | China | Tai Lake | KeShiZhan   | 2014/6/22 | 120.316 | 31.251 |
| 26 | <i>Acheilognathus macropterus</i> | Cypriniformes | Cyprinidae | Acheilognathus | China | Tai Lake | TangLou     | 2014/6/18 | 120.180 | 31.027 |
| 27 | <i>Acheilognathus macropterus</i> | Cypriniformes | Cyprinidae | Acheilognathus | China | Tai Lake | TangLou     | 2014/6/18 | 120.180 | 31.027 |
| 28 | <i>Acheilognathus macropterus</i> | Cypriniformes | Cyprinidae | Acheilognathus | China | Tai Lake | TangLou     | 2014/6/18 | 120.180 | 31.027 |
| 29 | <i>Aristichthys nobilis</i>       | Cypriniformes | Cyprinidae | Aristichthys   | China | Tai Lake | KeShiZhan   | 2014/6/22 | 120.316 | 31.251 |
| 30 | <i>Aristichthys nobilis</i>       | Cypriniformes | Cyprinidae | Aristichthys   | China | Tai Lake | KeShiZhan   | 2014/6/22 | 120.316 | 31.251 |
| 31 | <i>Aristichthys nobilis</i>       | Cypriniformes | Cyprinidae | Aristichthys   | China | Tai Lake | KeShiZhan   | 2014/6/22 | 120.316 | 31.251 |

|    |                                 |               |             |                  |       |          |             |           |         |        |
|----|---------------------------------|---------------|-------------|------------------|-------|----------|-------------|-----------|---------|--------|
| 32 | <i>Aristichthys nobilis</i>     | Cypriniformes | Cyprinidae  | Aristichthys     | China | Tai Lake | KeShiZhan   | 2014/6/22 | 120.316 | 31.251 |
| 33 | <i>Carassius auratus</i>        | Cypriniformes | Cyprinidae  | Carassius        | China | Tai Lake | ManShan     | 2014/6/22 | 120.161 | 31.179 |
| 34 | <i>Carassius auratus</i>        | Cypriniformes | Cyprinidae  | Carassius        | China | Tai Lake | PingTaiShan | 2014/6/10 | 120.034 | 31.214 |
| 35 | <i>Carassius auratus</i>        | Cypriniformes | Cyprinidae  | Carassius        | China | Tai Lake | TangLou     | 2014/6/18 | 120.180 | 31.027 |
| 36 | <i>Carassius auratus</i>        | Cypriniformes | Cyprinidae  | Carassius        | China | Tai Lake | TangLou     | 2014/6/18 | 120.180 | 31.027 |
| 37 | <i>Carassius auratus</i>        | Cypriniformes | Cyprinidae  | Carassius        | China | Tai Lake | TangLou     | 2014/6/18 | 120.180 | 31.027 |
| 38 | <i>Carassius auratus</i>        | Cypriniformes | Cyprinidae  | Carassius        | China | Tai Lake | ManShan     | 2014/6/22 | 120.161 | 31.179 |
| 39 | <i>Carassius auratus</i>        | Cypriniformes | Cyprinidae  | Carassius        | China | Tai Lake | PingTaiShan | 2014/6/10 | 120.034 | 31.214 |
| 40 | <i>Carassius auratus</i>        | Cypriniformes | Cyprinidae  | Carassius        | China | Tai Lake | PingTaiShan | 2014/6/10 | 120.034 | 31.214 |
| 41 | <i>Carassius auratus</i>        | Cypriniformes | Cyprinidae  | Carassius        | China | Tai Lake | TangLou     | 2014/6/18 | 120.180 | 31.027 |
| 42 | <i>Carassius auratus</i>        | Cypriniformes | Cyprinidae  | Carassius        | China | Tai Lake | ZhuShanHu   | 2014/6/18 | 120.025 | 31.325 |
| 43 | <i>Carassius auratus</i>        | Cypriniformes | Cyprinidae  | Carassius        | China | Tai Lake | TangLou     | 2014/6/18 | 120.180 | 31.027 |
| 44 | <i>Carassius auratus</i>        | Cypriniformes | Cyprinidae  | Carassius        | China | Tai Lake | PingTaiShan | 2014/6/10 | 120.034 | 31.214 |
| 45 | <i>Carassius auratus</i>        | Cypriniformes | Cyprinidae  | Carassius        | China | Tai Lake | GongHu      | 2014/6/22 | 120.286 | 31.337 |
| 46 | <i>Carassius auratus</i>        | Cypriniformes | Cyprinidae  | Carassius        | China | Tai Lake | ManShan     | 2014/6/22 | 120.161 | 31.179 |
| 47 | <i>Carassius auratus</i>        | Cypriniformes | Cyprinidae  | Carassius        | China | Tai Lake | KeShiZhan   | 2014/6/22 | 120.316 | 31.251 |
| 48 | <i>Carassius auratus</i>        | Cypriniformes | Cyprinidae  | Carassius        | China | Tai Lake | ManShan     | 2014/6/22 | 120.161 | 31.179 |
| 49 | <i>Carassius auratus</i>        | Cypriniformes | Cyprinidae  | Carassius        | China | Tai Lake | ManShan     | 2014/6/22 | 120.161 | 31.179 |
| 50 | <i>Carassius auratus</i>        | Cypriniformes | Cyprinidae  | Carassius        | China | Tai Lake | ManShan     | 2014/6/22 | 120.161 | 31.179 |
| 51 | <i>Channa argus</i>             | Perciformes   | Channidae   | Channa           | China | Tai Lake | ManShan     | 2014/6/22 | 120.161 | 31.179 |
| 52 | <i>Coilia nasus</i>             | Clupeiformes  | Engraulidae | Coilia           | China | Tai Lake | PingTaiShan | 2014/6/10 | 120.034 | 31.214 |
| 53 | <i>Coilia nasus</i>             | Clupeiformes  | Engraulidae | Coilia           | China | Tai Lake | PingTaiShan | 2014/6/10 | 120.034 | 31.214 |
| 54 | <i>Ctenopharyngodon idellus</i> | Cypriniformes | Cyprinidae  | Ctenopharyngodon | China | Tai Lake | PingTaiShan | 2014/6/10 | 120.034 | 31.214 |

|    |                                   |               |            |              |       |          |             |           |         |        |
|----|-----------------------------------|---------------|------------|--------------|-------|----------|-------------|-----------|---------|--------|
| 55 | <i>Culter dabryi</i>              | Cypriniformes | Cyprinidae | Culter       | China | Tai Lake | ManShan     | 2014/6/22 | 120.161 | 31.179 |
| 56 | <i>Cultrichthys erythropterus</i> | Cypriniformes | Cyprinidae | Cultrichthys | China | Tai Lake | TangLou     | 2014/6/18 | 120.180 | 31.027 |
| 57 | <i>Cultrichthys erythropterus</i> | Cypriniformes | Cyprinidae | Cultrichthys | China | Tai Lake | TangLou     | 2014/6/18 | 120.180 | 31.027 |
| 58 | <i>Cultrichthys erythropterus</i> | Cypriniformes | Cyprinidae | Cultrichthys | China | Tai Lake | TangLou     | 2014/6/18 | 120.180 | 31.027 |
| 59 | <i>Cultrichthys erythropterus</i> | Cypriniformes | Cyprinidae | Cultrichthys | China | Tai Lake | KeShiZhan   | 2014/6/22 | 120.316 | 31.251 |
| 60 | <i>Cultrichthys erythropterus</i> | Cypriniformes | Cyprinidae | Cultrichthys | China | Tai Lake | TangLou     | 2014/6/18 | 120.180 | 31.027 |
| 61 | <i>Cultrichthys erythropterus</i> | Cypriniformes | Cyprinidae | Cultrichthys | China | Tai Lake | TangLou     | 2014/6/18 | 120.180 | 31.027 |
| 62 | <i>Cultrichthys erythropterus</i> | Cypriniformes | Cyprinidae | Cultrichthys | China | Tai Lake | TangLou     | 2014/6/18 | 120.180 | 31.027 |
| 63 | <i>Cultrichthys erythropterus</i> | Cypriniformes | Cyprinidae | Cultrichthys | China | Tai Lake | KeShiZhan   | 2014/6/22 | 120.316 | 31.251 |
| 64 | <i>Cultrichthys erythropterus</i> | Cypriniformes | Cyprinidae | Cultrichthys | China | Tai Lake | TangLou     | 2014/6/18 | 120.180 | 31.027 |
| 65 | <i>Cyprinus carpio</i>            | Cypriniformes | Cyprinidae | Cyprinus     | China | Tai Lake | ZhuShanHu   | 2014/6/18 | 120.025 | 31.325 |
| 66 | <i>Cyprinus carpio</i>            | Cypriniformes | Cyprinidae | Cyprinus     | China | Tai Lake | GongHu      | 2014/6/22 | 120.286 | 31.337 |
| 67 | <i>Cyprinus carpio</i>            | Cypriniformes | Cyprinidae | Cyprinus     | China | Tai Lake | ManShan     | 2014/6/22 | 120.161 | 31.179 |
| 68 | <i>Cyprinus carpio</i>            | Cypriniformes | Cyprinidae | Cyprinus     | China | Tai Lake | GongHu      | 2014/6/22 | 120.286 | 31.337 |
| 69 | <i>Cyprinus carpio</i>            | Cypriniformes | Cyprinidae | Cyprinus     | China | Tai Lake | ManShan     | 2014/6/22 | 120.161 | 31.179 |
| 70 | <i>Hemibarbus maculatus</i>       | Cypriniformes | Cyprinidae | Hemibarbus   | China | Tai Lake | MeiLiangWan | 2014/5/29 | 120.172 | 31.396 |
| 71 | <i>Hemibarbus maculatus</i>       | Cypriniformes | Cyprinidae | Hemibarbus   | China | Tai Lake | MeiLiangWan | 2014/5/29 | 120.172 | 31.396 |
| 72 | <i>Hemibarbus maculatus</i>       | Cypriniformes | Cyprinidae | Hemibarbus   | China | Tai Lake | MeiLiangWan | 2014/5/29 | 120.172 | 31.396 |
| 73 | <i>Hemiculter leucisculus</i>     | Cypriniformes | Cyprinidae | Hemibarbus   | China | Tai Lake | TangLou     | 2014/6/18 | 120.180 | 31.027 |
| 74 | <i>Hemiculter leucisculus</i>     | Cypriniformes | Cyprinidae | Hemibarbus   | China | Tai Lake | ZhuShanHu   | 2014/6/18 | 120.025 | 31.325 |
| 75 | <i>Hemiculter leucisculus</i>     | Cypriniformes | Cyprinidae | Hemibarbus   | China | Tai Lake | KeShiZhan   | 2014/6/22 | 120.316 | 31.251 |
| 76 | <i>Hemiculter leucisculus</i>     | Cypriniformes | Cyprinidae | Hemibarbus   | China | Tai Lake | GongHu      | 2014/6/22 | 120.286 | 31.337 |
| 77 | <i>Hemiculter leucisculus</i>     | Cypriniformes | Cyprinidae | Hemibarbus   | China | Tai Lake | GongHu      | 2014/6/22 | 120.286 | 31.337 |
| 78 | <i>Hemiculter leucisculus</i>     | Cypriniformes | Cyprinidae | Hemibarbus   | China | Tai Lake | GongHu      | 2014/6/22 | 120.286 | 31.337 |
| 79 | <i>Hemiculter</i>                 | Cypriniformes | Cyprinidae | Hemibarbus   | China | Tai Lake | GongHu      | 2014/6/22 | 120.286 | 31.337 |

|     |                                    |               |                 |                    |       |          |             |           |         |        |
|-----|------------------------------------|---------------|-----------------|--------------------|-------|----------|-------------|-----------|---------|--------|
|     | <i>leucisculus</i>                 |               |                 |                    |       |          |             |           |         |        |
| 80  | <i>Hemiculter leucisculus</i>      | Cypriniformes | Cyprinidae      | Hemibarbus         | China | Tai Lake | TangLou     | 2014/6/18 | 120.180 | 31.027 |
| 81  | <i>Hemiculter leucisculus</i>      | Cypriniformes | Cyprinidae      | Hemibarbus         | China | Tai Lake | ZhuShanHu   | 2014/6/18 | 120.025 | 31.325 |
| 82  | <i>Hemiculter leucisculus</i>      | Cypriniformes | Cyprinidae      | Hemibarbus         | China | Tai Lake | GongHu      | 2014/6/22 | 120.286 | 31.337 |
| 83  | <i>Hemiculter leucisculus</i>      | Cypriniformes | Cyprinidae      | Hemibarbus         | China | Tai Lake | TangLou     | 2014/6/18 | 120.180 | 31.027 |
| 84  | <i>Hemiculter leucisculus</i>      | Cypriniformes | Cyprinidae      | Hemibarbus         | China | Tai Lake | KeShiZhan   | 2014/6/22 | 120.316 | 31.251 |
| 85  | <i>Hemiculter leucisculus</i>      | Cypriniformes | Cyprinidae      | Hemibarbus         | China | Tai Lake | TangLou     | 2014/6/18 | 120.180 | 31.027 |
| 86  | <i>Hemiculter leucisculus</i>      | Cypriniformes | Cyprinidae      | Hemibarbus         | China | Tai Lake | ZhuShanHu   | 2014/6/18 | 120.025 | 31.325 |
| 87  | <i>Hemiculter leucisculus</i>      | Cypriniformes | Cyprinidae      | Hemibarbus         | China | Tai Lake | ManShan     | 2014/6/22 | 120.161 | 31.179 |
| 88  | <i>Hypophthalmichthys molitrix</i> | Cypriniformes | Cyprinidae      | Hypophthalmichthys | China | Tai Lake | TangLou     | 2014/6/18 | 120.180 | 31.027 |
| 89  | <i>Hypophthalmichthys molitrix</i> | Cypriniformes | Cyprinidae      | Hypophthalmichthys | China | Tai Lake | KeShiZhan   | 2014/6/22 | 120.316 | 31.251 |
| 90  | <i>Hypophthalmichthys molitrix</i> | Cypriniformes | Cyprinidae      | Hypophthalmichthys | China | Tai Lake | KeShiZhan   | 2014/6/22 | 120.316 | 31.251 |
| 91  | <i>Hypophthalmichthys molitrix</i> | Cypriniformes | Cyprinidae      | Hypophthalmichthys | China | Tai Lake | KeShiZhan   | 2014/6/22 | 120.316 | 31.251 |
| 92  | <i>Hypophthalmichthys molitrix</i> | Cypriniformes | Cyprinidae      | Hypophthalmichthys | China | Tai Lake | ManShan     | 2014/6/22 | 120.161 | 31.179 |
| 93  | <i>Hyporhamphus intermedius</i>    | Cypriniformes | Cyprinidae      | Hypophthalmichthys | China | Tai Lake | MeiLiangWan | 2014/5/29 | 120.172 | 31.396 |
| 94  | <i>Hyporhamphus intermedius</i>    | Cypriniformes | Cyprinidae      | Hypophthalmichthys | China | Tai Lake | ManShan     | 2014/6/22 | 120.161 | 31.179 |
| 95  | <i>Hyporhamphus intermedius</i>    | Cypriniformes | Cyprinidae      | Hypophthalmichthys | China | Tai Lake | MeiLiangWan | 2014/5/29 | 120.172 | 31.396 |
| 96  | <i>Hyporhamphus intermedius</i>    | Cypriniformes | Cyprinidae      | Hypophthalmichthys | China | Tai Lake | MeiLiangWan | 2014/5/29 | 120.172 | 31.396 |
| 97  | <i>Mastacembelus sinensis</i>      | Perciformes   | Mastacembelidae | Mastacembelus      | China | Tai Lake | MeiLiangWan | 2014/5/29 | 120.172 | 31.396 |
| 98  | <i>Megalobrama amblycephala</i>    | Cypriniformes | Cyprinidae      | Megalobrama        | China | Tai Lake | ZhuShanHu   | 2014/6/18 | 120.025 | 31.325 |
| 99  | <i>Megalobrama amblycephala</i>    | Cypriniformes | Cyprinidae      | Megalobrama        | China | Tai Lake | ZhuShanHu   | 2014/6/18 | 120.025 | 31.325 |
| 100 | <i>Megalobrama amblycephala</i>    | Cypriniformes | Cyprinidae      | Megalobrama        | China | Tai Lake | TangLou     | 2014/6/18 | 120.180 | 31.027 |

|     |                                    |                  |               |                 |       |          |             |           |         |        |
|-----|------------------------------------|------------------|---------------|-----------------|-------|----------|-------------|-----------|---------|--------|
| 101 | <i>Megalobrama amblycephala</i>    | Cypriniformes    | Cyprinidae    | Megalobrama     | China | Tai Lake | TangLou     | 2014/6/18 | 120.180 | 31.027 |
| 102 | <i>Megalobrama amblycephala</i>    | Cypriniformes    | Cyprinidae    | Megalobrama     | China | Tai Lake | ZhuShanHu   | 2014/6/18 | 120.025 | 31.325 |
| 103 | <i>Megalobrama amblycephala</i>    | Cypriniformes    | Cyprinidae    | Megalobrama     | China | Tai Lake | ZhuShanHu   | 2014/6/18 | 120.025 | 31.325 |
| 104 | <i>Megalobrama amblycephala</i>    | Cypriniformes    | Cyprinidae    | Megalobrama     | China | Tai Lake | ZhuShanHu   | 2014/6/18 | 120.025 | 31.325 |
| 105 | <i>Megalobrama amblycephala</i>    | Cypriniformes    | Cyprinidae    | Megalobrama     | China | Tai Lake | GongHu      | 2014/6/22 | 120.286 | 31.337 |
| 106 | <i>Megalobrama_s kolkovii</i>      | Cypriniformes    | Cyprinidae    | Megalobrama     | China | Tai Lake | ZhuShanHu   | 2014/6/18 | 120.025 | 31.325 |
| 107 | <i>Megalobrama_s kolkovii</i>      | Cypriniformes    | Cyprinidae    | Megalobrama     | China | Tai Lake | GongHu      | 2014/6/22 | 120.286 | 31.337 |
| 108 | <i>Microphysogobio microstomus</i> | Cypriniformes    | Cyprinidae    | Microphysogobio | China | Tai Lake | TangLou     | 2014/6/18 | 120.180 | 31.027 |
| 109 | <i>Microphysogobio microstomus</i> | Cypriniformes    | Cyprinidae    | Microphysogobio | China | Tai Lake | TangLou     | 2014/6/18 | 120.180 | 31.027 |
| 110 | <i>Microphysogobio microstomus</i> | Cypriniformes    | Cyprinidae    | Microphysogobio | China | Tai Lake | TangLou     | 2014/6/18 | 120.180 | 31.027 |
| 111 | <i>Microphysogobio microstomus</i> | Cypriniformes    | Cyprinidae    | Microphysogobio | China | Tai Lake | TangLou     | 2014/6/18 | 120.180 | 31.027 |
| 112 | <i>Misgurnus anguillicaudatus</i>  | Cypriniformes    | Cobitidae     | Misgurnus       | China | Tai Lake | MeiLiangWan | 2014/5/29 | 120.172 | 31.396 |
| 113 | <i>Misgurnus anguillicaudatus</i>  | Cypriniformes    | Cobitidae     | Misgurnus       | China | Tai Lake | MeiLiangWan | 2014/5/29 | 120.172 | 31.396 |
| 114 | <i>Monopterus albus</i>            | Synbranchiformes | Synbranchidae | Monopterus      | China | Tai Lake | KeShiZhan   | 2014/6/22 | 120.316 | 31.251 |
| 115 | <i>Monopterus albus</i>            | Synbranchiformes | Synbranchidae | Monopterus      | China | Tai Lake | GongHu      | 2014/6/22 | 120.286 | 31.337 |
| 116 | <i>Monopterus albus</i>            | Synbranchiformes | Synbranchidae | Monopterus      | China | Tai Lake | MeiLiangWan | 2014/5/29 | 120.172 | 31.396 |
| 117 | <i>Monopterus albus</i>            | Synbranchiformes | Synbranchidae | Monopterus      | China | Tai Lake | GongHu      | 2014/6/22 | 120.286 | 31.337 |
| 118 | <i>Monopterus albus</i>            | Synbranchiformes | Synbranchidae | Monopterus      | China | Tai Lake | MeiLiangWan | 2014/5/29 | 120.172 | 31.396 |
| 119 | <i>Monopterus albus</i>            | Synbranchiformes | Synbranchidae | Monopterus      | China | Tai Lake | MeiLiangWan | 2014/5/29 | 120.172 | 31.396 |
| 120 | <i>Monopterus albus</i>            | Synbranchiformes | Synbranchidae | Monopterus      | China | Tai Lake | KeShiZhan   | 2014/6/22 | 120.316 | 31.251 |
| 121 | <i>Mylopharyngodon</i>             | Cypriniformes    | Cyprinidae    | Mylopharyngodon | China | Tai Lake | ManShan     | 2014/6/22 | 120.161 | 31.179 |

|     |                                  |               |              |                 |       |          |             |           |         |        |
|-----|----------------------------------|---------------|--------------|-----------------|-------|----------|-------------|-----------|---------|--------|
|     | <i>on piceus</i>                 |               |              |                 |       |          |             |           |         |        |
| 122 | <i>Mylopharyngodon piceus</i>    | Cypriniformes | Cyprinidae   | Mylopharyngodon | China | Tai Lake | ManShan     | 2014/6/22 | 120.161 | 31.179 |
| 123 | <i>Odontamblyopus rubicundus</i> | Perciformes   | Taenioididae | Odontamblyopus  | China | Tai Lake | MeiLiangWan | 2014/5/29 | 120.172 | 31.396 |
| 124 | <i>Odontamblyopus rubicundus</i> | Perciformes   | Taenioididae | Odontamblyopus  | China | Tai Lake | ManShan     | 2014/6/22 | 120.161 | 31.179 |
| 125 | <i>Odontobutis potamophila</i>   | Perciformes   | Eleotridae   | Odontobutis     | China | Tai Lake | KeShiZhan   | 2014/6/22 | 120.316 | 31.251 |
| 126 | <i>Odontobutis potamophila</i>   | Perciformes   | Eleotridae   | Odontobutis     | China | Tai Lake | KeShiZhan   | 2014/6/22 | 120.316 | 31.251 |
| 127 | <i>Odontobutis potamophila</i>   | Perciformes   | Eleotridae   | Odontobutis     | China | Tai Lake | KeShiZhan   | 2014/6/22 | 120.316 | 31.251 |
| 128 | <i>Odontobutis potamophila</i>   | Perciformes   | Eleotridae   | Odontobutis     | China | Tai Lake | KeShiZhan   | 2014/6/22 | 120.316 | 31.251 |
| 129 | <i>Odontobutis potamophila</i>   | Perciformes   | Eleotridae   | Odontobutis     | China | Tai Lake | KeShiZhan   | 2014/6/22 | 120.316 | 31.251 |
| 130 | <i>Odontobutis potamophila</i>   | Perciformes   | Eleotridae   | Odontobutis     | China | Tai Lake | KeShiZhan   | 2014/6/22 | 120.316 | 31.251 |
| 131 | <i>Paramisgurnus dabryanus</i>   | Cypriniformes | Cobitidae    | Paramisgurnus   | China | Tai Lake | KeShiZhan   | 2014/6/22 | 120.316 | 31.251 |
| 132 | <i>Pelteobagrus fulvidraco</i>   | Siluriformes  | Bagridae     | Pelteobagrus    | China | Tai Lake | ManShan     | 2014/6/22 | 120.161 | 31.179 |
| 133 | <i>Pelteobagrus fulvidraco</i>   | Siluriformes  | Bagridae     | Pelteobagrus    | China | Tai Lake | MeiLiangWan | 2014/5/29 | 120.172 | 31.396 |
| 134 | <i>Pelteobagrus fulvidraco</i>   | Siluriformes  | Bagridae     | Pelteobagrus    | China | Tai Lake | GongHu      | 2014/6/22 | 120.286 | 31.337 |
| 135 | <i>Pelteobagrus fulvidraco</i>   | Siluriformes  | Bagridae     | Pelteobagrus    | China | Tai Lake | MeiLiangWan | 2014/5/29 | 120.172 | 31.396 |
| 136 | <i>Pelteobagrus fulvidraco</i>   | Siluriformes  | Bagridae     | Pelteobagrus    | China | Tai Lake | MeiLiangWan | 2014/5/29 | 120.172 | 31.396 |
| 137 | <i>Pelteobagrus fulvidraco</i>   | Siluriformes  | Bagridae     | Pelteobagrus    | China | Tai Lake | MeiLiangWan | 2014/5/29 | 120.172 | 31.396 |
| 138 | <i>Pelteobagrus fulvidraco</i>   | Siluriformes  | Bagridae     | Pelteobagrus    | China | Tai Lake | GongHu      | 2014/6/22 | 120.286 | 31.337 |
| 139 | <i>Pelteobagrus fulvidraco</i>   | Siluriformes  | Bagridae     | Pelteobagrus    | China | Tai Lake | ZhuShanHu   | 2014/6/18 | 120.025 | 31.325 |
| 140 | <i>Pelteobagrus fulvidraco</i>   | Siluriformes  | Bagridae     | Pelteobagrus    | China | Tai Lake | MeiLiangWan | 2014/5/29 | 120.172 | 31.396 |
| 141 | <i>Pseudobrama simoni</i>        | Cypriniformes | Cyprinidae   | Pseudobrama     | China | Tai Lake | ManShan     | 2014/6/22 | 120.161 | 31.179 |
| 142 | <i>Pseudobrama simoni</i>        | Cypriniformes | Cyprinidae   | Pseudobrama     | China | Tai Lake | GongHu      | 2014/6/22 | 120.286 | 31.337 |

|     |                                 |               |            |             |       |          |           |           |         |        |
|-----|---------------------------------|---------------|------------|-------------|-------|----------|-----------|-----------|---------|--------|
| 143 | <i>Pseudobrama<br/>simoni</i>   | Cypriniformes | Cyprinidae | Pseudobrama | China | Tai Lake | ManShan   | 2014/6/22 | 120.161 | 31.179 |
| 144 | <i>Pseudobrama<br/>simoni</i>   | Cypriniformes | Cyprinidae | Pseudobrama | China | Tai Lake | ManShan   | 2014/6/22 | 120.161 | 31.179 |
| 145 | <i>Rhinogobius<br/>giurinus</i> | Perciformes   | Gobiidae   | Rhinogobius | China | Tai Lake | ManShan   | 2014/6/22 | 120.161 | 31.179 |
| 146 | <i>Rhinogobius<br/>giurinus</i> | Perciformes   | Gobiidae   | Rhinogobius | China | Tai Lake | ZhuShanHu | 2014/6/18 | 120.025 | 31.325 |
| 147 | <i>Rhinogobius<br/>giurinus</i> | Perciformes   | Gobiidae   | Rhinogobius | China | Tai Lake | TangLou   | 2014/6/18 | 120.180 | 31.027 |
| 148 | <i>Rhinogobius<br/>giurinus</i> | Perciformes   | Gobiidae   | Rhinogobius | China | Tai Lake | ZhuShanHu | 2014/6/18 | 120.025 | 31.325 |
| 149 | <i>Rhinogobius<br/>giurinus</i> | Perciformes   | Gobiidae   | Rhinogobius | China | Tai Lake | ZhuShanHu | 2014/6/18 | 120.025 | 31.325 |
| 150 | <i>Rhinogobius<br/>giurinus</i> | Perciformes   | Gobiidae   | Rhinogobius | China | Tai Lake | ZhuShanHu | 2014/6/18 | 120.025 | 31.325 |
| 151 | <i>Rhinogobius<br/>giurinus</i> | Perciformes   | Gobiidae   | Rhinogobius | China | Tai Lake | GongHu    | 2014/6/22 | 120.286 | 31.337 |
| 152 | <i>Rhinogobius<br/>giurinus</i> | Perciformes   | Gobiidae   | Rhinogobius | China | Tai Lake | GongHu    | 2014/6/22 | 120.286 | 31.337 |
| 153 | <i>Rhinogobius<br/>giurinus</i> | Perciformes   | Gobiidae   | Rhinogobius | China | Tai Lake | TangLou   | 2014/6/18 | 120.180 | 31.027 |
| 154 | <i>Rhinogobius<br/>giurinus</i> | Perciformes   | Gobiidae   | Rhinogobius | China | Tai Lake | ZhuShanHu | 2014/6/18 | 120.025 | 31.325 |
| 155 | <i>Rhinogobius<br/>giurinus</i> | Perciformes   | Gobiidae   | Rhinogobius | China | Tai Lake | ManShan   | 2014/6/22 | 120.161 | 31.179 |
| 156 | <i>Rhinogobius<br/>giurinus</i> | Perciformes   | Gobiidae   | Rhinogobius | China | Tai Lake | GongHu    | 2014/6/22 | 120.286 | 31.337 |
| 157 | <i>Rhinogobius<br/>giurinus</i> | Perciformes   | Gobiidae   | Rhinogobius | China | Tai Lake | ManShan   | 2014/6/22 | 120.161 | 31.179 |
| 158 | <i>Rhinogobius<br/>giurinus</i> | Perciformes   | Gobiidae   | Rhinogobius | China | Tai Lake | ZhuShanHu | 2014/6/18 | 120.025 | 31.325 |
| 159 | <i>Rhinogobius<br/>giurinus</i> | Perciformes   | Gobiidae   | Rhinogobius | China | Tai Lake | ZhuShanHu | 2014/6/18 | 120.025 | 31.325 |
| 160 | <i>Rhinogobius<br/>giurinus</i> | Perciformes   | Gobiidae   | Rhinogobius | China | Tai Lake | ManShan   | 2014/6/22 | 120.161 | 31.179 |
| 161 | <i>Rhodeus<br/>ocellatus</i>    | Cypriniformes | Cyprinidae | Rhodeus     | China | Tai Lake | TangLou   | 2014/6/18 | 120.180 | 31.027 |
| 162 | <i>Rhodeus<br/>ocellatus</i>    | Cypriniformes | Cyprinidae | Rhodeus     | China | Tai Lake | TangLou   | 2014/6/18 | 120.180 | 31.027 |
| 163 | <i>Rhodeus<br/>ocellatus</i>    | Cypriniformes | Cyprinidae | Rhodeus     | China | Tai Lake | TangLou   | 2014/6/18 | 120.180 | 31.027 |
| 164 | <i>Rhodeus</i>                  | Cypriniformes | Cyprinidae | Rhodeus     | China | Tai Lake | TangLou   | 2014/6/18 | 120.180 | 31.027 |



|     |                                      |               |            |                   |       |          |             |           |         |        |
|-----|--------------------------------------|---------------|------------|-------------------|-------|----------|-------------|-----------|---------|--------|
|     | <i>ocellatus</i>                     |               |            |                   |       |          |             |           |         |        |
| 165 | <i>Rhodeus ocellatus</i>             | Cypriniformes | Cyprinidae | Rhodeus           | China | Tai Lake | TangLou     | 2014/6/18 | 120.180 | 31.027 |
| 166 | <i>Rhodeus ocellatus</i>             | Cypriniformes | Cyprinidae | Rhodeus           | China | Tai Lake | TangLou     | 2014/6/18 | 120.180 | 31.027 |
| 167 | <i>Rhodeus sinensis</i>              | Cypriniformes | Cyprinidae | Rhodeus           | China | Tai Lake | TangLou     | 2014/6/18 | 120.180 | 31.027 |
| 168 | <i>Rhodeus sinensis</i>              | Cypriniformes | Cyprinidae | Rhodeus           | China | Tai Lake | TangLou     | 2014/6/18 | 120.180 | 31.027 |
| 169 | <i>Rhodeus sinensis</i>              | Cypriniformes | Cyprinidae | Rhodeus           | China | Tai Lake | GongHu      | 2014/6/22 | 120.286 | 31.337 |
| 170 | <i>Rhodeus sinensis</i>              | Cypriniformes | Cyprinidae | Rhodeus           | China | Tai Lake | TangLou     | 2014/6/18 | 120.180 | 31.027 |
| 171 | <i>Rhodeus sinensis</i>              | Cypriniformes | Cyprinidae | Rhodeus           | China | Tai Lake | TangLou     | 2014/6/18 | 120.180 | 31.027 |
| 172 | <i>Sarcocheilichthys nigripinnis</i> | Cypriniformes | Cyprinidae | Sarcocheilichthys | China | Tai Lake | KeShiZhan   | 2014/6/22 | 120.316 | 31.251 |
| 173 | <i>Sarcocheilichthys nigripinnis</i> | Cypriniformes | Cyprinidae | Sarcocheilichthys | China | Tai Lake | TangLou     | 2014/6/18 | 120.180 | 31.027 |
| 174 | <i>Sarcocheilichthys nigripinnis</i> | Cypriniformes | Cyprinidae | Sarcocheilichthys | China | Tai Lake | KeShiZhan   | 2014/6/22 | 120.316 | 31.251 |
| 175 | <i>Sarcocheilichthys nigripinnis</i> | Cypriniformes | Cyprinidae | Sarcocheilichthys | China | Tai Lake | PingTaiShan | 2014/6/10 | 120.034 | 31.214 |
| 176 | <i>Sarcocheilichthys nigripinnis</i> | Cypriniformes | Cyprinidae | Sarcocheilichthys | China | Tai Lake | TangLou     | 2014/6/18 | 120.180 | 31.027 |
| 177 | <i>Sarcocheilichthys nigripinnis</i> | Cypriniformes | Cyprinidae | Sarcocheilichthys | China | Tai Lake | KeShiZhan   | 2014/6/22 | 120.316 | 31.251 |
| 178 | <i>Silurus asotus</i>                | Siluriformes  | Siluridae  | Silurus           | China | Tai Lake | MeiLiangWan | 2014/5/29 | 120.172 | 31.396 |
| 179 | <i>Silurus asotus</i>                | Siluriformes  | Siluridae  | Silurus           | China | Tai Lake | ManShan     | 2014/6/22 | 120.161 | 31.179 |
| 180 | <i>Tridentiger bifasciatus</i>       | Perciformes   | Gobiidae   | Tridentiger       | China | Tai Lake | PingTaiShan | 2014/6/10 | 120.034 | 31.214 |
